# Supplementary material
Source: publisher figshare collection journal article supplement (https://frontiersin.figshare.com/ndownloader/files/32584967)
Supplement: Supplementary file 1 [file 32584967]

Table A3: Overview over biomass and volume of the 66 study plots, including location, elevation, climate type and whether the plots are in a natural state or anthropogenically affected (Status).

| Plot characteristics | | | | | Biomass (Mg ha-1) | | Volume (m3 ha-1) |
| --- | --- | --- | --- | --- | --- | --- | --- |
| Plot | Zone | Status | Climate Type | Elevation (m asl) | CWD | FWD | CWD |
| SAV1 | Savanna | Natural | Dry | 871 | 0 | 0.41 | 0 |
| SAV2 | Savanna | Natural | Dry | 912 | 0.09 | 0.31 | 0 |
| SAV3 | Savanna | Natural | Dry | 1130 | 0 | 0.1 | 0 |
| SAV4 | Savanna | Natural | Dry | 993 | 0 | 1.63 | 0 |
| SAV5 | Savanna | Natural | Dry | 950 | 0 | 0.72 | 0 |
| MAI1 | Savanna | Affected | Dry | 1020 | 0 | 0.01 | 0 |
| MAI2 | Savanna | Affected | Dry | 860 | 0 | 0 | 0 |
| MAI3 | Savanna | Affected | Dry | 890 | 0 | 0 | 0 |
| MAI4 | Savanna | Affected | Dry | 960 | 0 | 0.06 | 0 |
| MAI5 | Savanna | Affected | Dry | 962 | 0 | 0.11 | 0 |
| FLM1 | Low.mon | Natural | Wet | 1920 | 17.41 | 9.19 | 4.7 |
| FLM2 | Low.mon | Natural | Wet | 1800 | 11.63 | 4.53 | 3.6 |
| FLM3 | Low.mon | Natural | Wet | 1620 | 18.43 | 4.82 | 6 |
| FLM4 | Low.mon | Natural | Wet | 1650 | 27.93 | 6.87 | 6.3 |
| FLM6 | Low.mon | Natural | Wet | 2040 | 11.96 | 2.85 | 4.8 |
| HOM1 | Low.mon | Affected | Wet | 1640 | 7.47 | 2.28 | 2.1 |
| HOM2 | Low.mon | Affected | Moist | 1150 | 2.34 | 1.81 | 0.5 |
| HOM3 | Low.mon | Affected | Wet | 1840 | 0.98 | 2.26 | 0.3 |
| HOM4 | Low.mon | Affected | Moist | 1260 | 0.84 | 1.51 | 0.2 |
| HOM5 | Low.mon | Affected | Moist | 1560 | 0.08 | 1.67 | 0 |
| COF1 | Low.mon | Affected | Moist | 1307 | 0 | 0.99 | 0 |
| COF2 | Low.mon | Affected | Moist | 1360 | 0 | 0.73 | 0 |
| COF3 | Low.mon | Affected | Moist | 1300 | 0 | 0.55 | 0 |
| COF4 | Low.mon | Affected | Dry |  | 0 | 0.11 | 0 |
| COF5 | Low.mon | Affected | Moist | 1660 | 0 | 0.81 | 0 |
| COF6 | Low.mon | Affected | Moist | 1500 | 0 | 0.29 | 0 |
| GRA1 | Low.mon | Affected | Wet | 1660 | 0 | 0 | 0 |
| GRA2 | Low.mon | Affected | Wet | 1750 | 0 | 0.02 | 0 |
| GRA4 | Low.mon | Affected | Moist | 1310 | 0 | 0.25 | 0 |
| GRA5 | Low.mon | Affected | Moist | 1300 | 0 | 0 | 0 |
| GRA6 | Low.mon | Affected | Moist | 1400 | 0 | 0.17 | 0 |
| FOC1 | Montane | Natural | Wet | 2120 | 3.1 | 8.05 | 1 |
| FOC2 | Montane | Natural | Wet | 2260 | 11.05 | 25.57 | 3.8 |
| FOC3 | Montane | Natural | Wet | 2540 | 87.46 | 17.9 | 22.8 |
| FOC4 | Montane | Natural | Wet | 2650 | 64.55 | 20.6 | 19.7 |
| FOC5 | Montane | Natural | Wet | 2750 | 32.39 | 4.13 | 9.7 |
| FOD1 | Montane | Affected | Wet | 2220 | 109.38 | 8.13 | 29.1 |
| FOD2 | Montane | Affected | Wet | 2470 | 55.77 | 11.26 | 16.6 |
| FOD3 | Montane | Affected | Wet | 2270 | 206.68 | 4.72 | 61.1 |
| FOD4 | Montane | Affected | Wet | 2560 | 8.43 | 3.9 | 3.4 |
| FOD5 | Montane | Affected | Wet | 2370 | 12.81 | 2.5 | 5.6 |
| FPO1 | Upp.mon | Natural | Wet | 2850 | 45.47 | 6.09 | 12.5 |
| FPO2 | Upp.mon | Natural | Wet | 2940 | 36.8 | 4.4 | 11.2 |
| FPO3 | Upp.mon | Natural | Wet | 2970 | 24.35 | 8.3 | 7.1 |
| FPO4 | Upp.mon | Natural | Wet | 2720 | 5.85 | 3.96 | 1.6 |
| FPO5 | Upp.mon | Natural | Wet | 2800 | 2 | 2.45 | 5.7 |
| FPD1 | Upp.mon | Affected | Wet | 3060 | 17.32 | 4.26 | 6.9 |
| FPD2 | Upp.mon | Affected | Wet | 2990 | 7.38 | 5.05 | 2 |
| FPD3 | Upp.mon | Affected | Wet | 2880 | 1.44 | 4.01 | 0.4 |
| COF6 | Low.mon | Affected | Moist | 1500 | 0 | 0.29 | 0 |
| GRA1 | Low.mon | Affected | Wet | 1660 | 0 | 0 | 0 |
| GRA2 | Low.mon | Affected | Wet | 1750 | 0 | 0.02 | 0 |
| GRA4 | Low.mon | Affected | Moist | 1310 | 0 | 0.25 | 0 |
| GRA5 | Low.mon | Affected | Moist | 1300 | 0 | 0 | 0 |
| GRA6 | Low.mon | Affected | Moist | 1400 | 0 | 0.17 | 0 |
| FOC1 | Montane | Natural | Wet | 2120 | 3.1 | 8.05 | 1 |
| FOC2 | Montane | Natural | Wet | 2260 | 11.05 | 25.57 | 3.8 |
| FOC3 | Montane | Natural | Wet | 2540 | 87.46 | 17.9 | 22.8 |
| FOC4 | Montane | Natural | Wet | 2650 | 64.55 | 20.6 | 19.7 |
| FOC5 | Montane | Natural | Wet | 2750 | 32.39 | 4.13 | 9.7 |
| FOD1 | Montane | Affected | Wet | 2220 | 109.38 | 8.13 | 29.1 |
| FOD2 | Montane | Affected | Wet | 2470 | 55.77 | 11.26 | 16.6 |
| FOD3 | Montane | Affected | Wet | 2270 | 206.68 | 4.72 | 61.1 |
| FOD4 | Montane | Affected | Wet | 2560 | 8.43 | 3.9 | 3.4 |
| FOD5 | Montane | Affected | Wet | 2370 | 12.81 | 2.5 | 5.6 |
| FPO1 | Upp.mon | Natural | Wet | 2850 | 45.47 | 6.09 | 12.5 |
| FPO2 | Upp.mon | Natural | Wet | 2940 | 36.8 | 4.4 | 11.2 |
| FPO3 | Upp.mon | Natural | Wet | 2970 | 24.35 | 8.3 | 7.1 |
| FPO4 | Upp.mon | Natural | Wet | 2720 | 5.85 | 3.96 | 1.6 |
| FPO5 | Upp.mon | Natural | Wet | 2800 | 2 | 2.45 | 5.7 |
| FPD1 | Upp.mon | Affected | Wet | 3060 | 17.32 | 4.26 | 6.9 |
| FPD2 | Upp.mon | Affected | Wet | 2990 | 7.38 | 5.05 | 2 |
| FPD3 | Upp.mon | Affected | Wet | 2880 | 1.44 | 4.01 | 0.4 |
| FPD4 | Upp.mon | Affected | Wet | 2820 | 0.6 | 6.67 | 0.2 |
| FPD5 | Upp.mon | Affected | Wet | 2770 | 2.18 | 3.82 | 0.7 |

The plot abbreviations refer to the following habitats: savanna woodlands (SAV), maize fields (MAI), lower montane rainforest (FLM), home gardens (HOM), coffee plantations (COF), grasslands (GRA), montane *Ocotea* forests (FOC), selectively logged *Ocotea* forests (FOD), upper montane *Podocarpus* forests (FPO), burned upper montane *Podocarpus* forests (FPD), subalpine *Erica* forests (FER), burned subalpine *Erica* forests (FED) and alpine *Helichrysum* heathlands (HEL). Climate type refers to categories defined by Chave et al. (2005) with regard to the ratio of temperature/precipitation
